# Supplementary material
Source: PubMed Central journal article supplement (PMC5041187)
Supplement: cdd201644x1.pdf [file cdd201644x1.pdf]

## **SUPPLEMENTARY FIGURE LEGENDS**

### **Supplementary Figure 1. FKBP51 and SUMO2/3 are expressed in mouse hippocampus.**

(a) Brain cryosections were immunostained with anti-FKBP51 (green) and monoclonal anti-SUMO2/3 (red) antibodies. (b) Brain cryosections were immunostained with anti-FKBP51 or anti-NeuN (green) and anti-SUMO2/3 (red) antibodies. DAPI (blue) was used for nuclei staining.

### **Supplementary Figure 2. SUMO conjugation to FKBP51 does not alter protein half-life and is critical for its inhibitory effect on GR transcriptional activity.**

(a) HEK293T cells were transfected with TAT4-luc and GR plasmids, and with or without wt, K422R or 2KR FKBP51, and stimulated with Dex 1 nM or vehicle -B- for 8 h. Results are expressed as mean  $\pm$ SEM (n=4). Protein levels were analyzed by western blotting. (b) HEK293T cells were transfected with wt or K422R FKBP51 plasmids, and treated with CHX (50  $\mu$ g/ml) for the indicated time periods. Lysates were analyzed by western blotting using the indicated antibodies. FKBP51 protein levels were analyzed by densitometry using GAPDH as control. \*\*\* p<0.001.

**Supplementary Figure 3. FKBP51 SUMOylation regulates Dex-induced expression of the endogenous target genes SGK1 and GILZ.** HT22 cells transfected with GR plasmids with or without wt or K422R FKBP51 were stimulated with Dex 1 nM or vehicle -B- for 8 h, and SGK1 and GILZ mRNA levels were analyzed. Results are expressed as mean  $\pm$ SEM (n=3). \* p<0.05, \*\* p<0.01, \*\*\* p<0.001

**Supplementary Figure 4. Mutation of K422 does not modify FKBP51 activity on NF- $\kappa$ B signaling.** (a) HEK293T cells transfected with  $\kappa$ B-luc, and with or without wt or K422R

FKBP51, were stimulated with PMA (50ng/ml) or vehicle for 8 h. Results, as folds of PMA stimulation, are expressed as mean  $\pm$ SEM (n=3). **(b)** Lysates from HEK293T cells transfected with the indicated plasmids were immunoprecipitated with anti-FLAG antibody and analyzed by western blotting using the indicated antibodies. \*  $p < 0.05$

**Supplementary Figure 5. SUMO conjugation to FKBP51 regulates GR nuclear translocation.** HT22 cells transfected with YFP-GR plasmid with or without wt or K422R FKBP51 were stimulated with Dex 1  $\mu$ M. Results are expressed as mean  $\pm$ SEM of one representative experiment (n=3).
